# Supplementary material for: How Effective Is Phage Therapy for Prosthetic Joint Infections? A Preliminary Systematic Review and Proportional Meta-Analysis of Early Outcomes
Source: MDPI journal article supplement (doi:10.3390/medicina60050790), 2024-05-09
Supplement: s1 [file s1]

## Data Extraction Tool

**Study ID:**

**Title:**

**Lead author contact details:**

**Country in which the study conducted:**

1. United States
2. UK
3. Canada
4. Australia
5. Other

### Study Purpose:

**Study design:**

**Start date:**

End date:

**Study funding sources:**

## Participants

**Population description:**

**Setting:**

**Inclusion criteria:**

**Exclusion criteria:**

**Total number of participants who received therapy:**

### Baseline Population Characteristics:

|         | Age | Gender | Presenting Problem | Organism(s) causing infection | Prior treatment failure with standard of care? | Therapeutic Dead end? (IE facing amputation if not PT) |
|---------|-----|--------|--------------------|-------------------------------|------------------------------------------------|--------------------------------------------------------|
| Patient |     |        |                    |                               |                                                |                                                        |

### Intervention and Comparisons, Outcomes, and Complications

[illegible]

|                                                                                                      | Number | Proportion (out of total patients receiving therapy) |
|------------------------------------------------------------------------------------------------------|--------|------------------------------------------------------|
| Number demonstrating infection eradication (clinical criteria alone)                                 |        |                                                      |
| Number demonstrating infection eradication (arthrocentesis/ culture data supporting negative growth) |        |                                                      |
| Number demonstrating infection eradication (PET Scan supporting)                                     |        |                                                      |
| Total number with infection eradication                                                              |        |                                                      |
