# Supplementary material for: How Effective Is Phage Therapy for Prosthetic Joint Infections? A Preliminary Systematic Review and Proportional Meta-Analysis of Early Outcomes
Source: MDPI journal article supplement (doi:10.3390/medicina60050790), 2024-05-09
Supplement: s1 [file s1]

**Supplemental File S5: Consensus Quality Assessment Evaluation of Included Studies**

## Quality Assessment for Case Series Using the NHLBI Assessment Tool

|                                         | Clear<br>Study<br>Objectives | Clear<br>Study<br>Population<br>Description | Consecutive<br>Cases | Comparable<br>Subjects | Clearly<br>Defined<br>Intervention | Clearly<br>Defined<br>Outcomes | Adequate<br>Follow-<br>up | Clearly<br>Described<br>Statistics | Well<br>Described<br>Results | Quality<br>Rating<br>(Good, Fair,<br>or Poor) |
|-----------------------------------------|------------------------------|---------------------------------------------|----------------------|------------------------|------------------------------------|--------------------------------|---------------------------|------------------------------------|------------------------------|-----------------------------------------------|
| <b>Doub et al.<br/>2023 [25]</b>        |                              |                                             | NR*                  |                        |                                    |                                |                           |                                    |                              | Fair                                          |
| <b>Ferry et al.<br/>2020 [26]</b>       |                              |                                             |                      |                        |                                    |                                |                           |                                    |                              | Fair                                          |
| <b>Onallah et<br/>al. 2023<br/>[19]</b> |                              |                                             | NR*                  |                        |                                    |                                |                           |                                    |                              | Poor                                          |

\*NR = Not Reported. Green = Meets criteria. Red = Does not meet criteria.

Quality Assessment for Case Control Studies Using the NHLBI Assessment Tool

|                                                           |                          |
|-----------------------------------------------------------|--------------------------|
| Quality Rating (Good, Fair, or Poor)                      | Fair                     |
| Potential Confounders Measured and Adjusted               |                          |
| Loss to Follow-up >20%                                    |                          |
| Assessors Blinded to Exposure                             | NR*                      |
| Outcomes Clearly Defined                                  |                          |
| Exposure Measured More than Once Over Time                |                          |
| Exposures clearly defined                                 |                          |
| Varied Categories of the Exposure Measured, if Applicable | N/A                      |
| Sufficient Time Frame                                     |                          |
| Exposure Measure Prior to Outcome                         |                          |
| Sample Size Justification Provided                        |                          |
| Comparable subjects                                       |                          |
| Participation > 50%                                       |                          |
| Clear Study Population Description                        |                          |
| Clear Study Objectives                                    |                          |
|                                                           | Fedorov et al. 2023 [29] |

\*NR = Not Reported. Green = Meets criteria. Red = Does not meet criteria.
