# Supplementary material for: How Effective Is Phage Therapy for Prosthetic Joint Infections? A Preliminary Systematic Review and Proportional Meta-Analysis of Early Outcomes
Source: Medicina (Kaunas). 2024 May 9;60(5):790. doi: 10.3390/medicina60050790 (PMC11122905; doi:10.3390/medicina60050790)
Supplement: Supplementary file 1 [file medicina-60-00790-s001.zip]

Archive with 5 entries (5 files):
- S1.pdf
- S2.pdf
- S3.txt
- S4.pdf
- S5.pdf
