# Supplementary material for: How Effective Is Phage Therapy for Prosthetic Joint Infections? A Preliminary Systematic Review and Proportional Meta-Analysis of Early Outcomes
Source: Medicina (Kaunas). 2024 May 9;60(5):790. doi: 10.3390/medicina60050790 (PMC11122905; doi:10.3390/medicina60050790)
Supplement: Supplementary file 1 [file medicina-60-00790-s001.zip › S3.txt]

Total imported references for screening 1154
After duplicates removed from Covidence 762

==MEDLINE (Ovid)==
Ovid MEDLINE(R) and Epub Ahead of Print, In-Process, In-Data-Review & Other Non-Indexed Citations, Daily and Versions 1946 to September 22, 2023
2023-09-22
340 Records 

1. exp "phage therapy"/ OR exp bacteriophages/ OR exp bacteriophage typing/ OR (phage? OR phagotherap* OR bacteriophag* OR endolysin?).ab,kf,kw,ti.

2. "Prosthesis-Related Infections"/ OR exp "Arthritis, Infectious"/ OR ((musculoskeletal OR joint$1 OR periprosthetic OR prosthetic$1 OR prosthesis OR prostheses OR implant$1 OR osteoarticular OR orthopaedic OR orthopedic OR intraarticular OR biofilm$1 OR knee$1 OR hip$1) adj3 (infect$ OR septic OR sepsis)) OR "infectious arthritis" OR "bacterial arthritis" OR "septic arthritis" or ((bone adj3 (surgery or surgeries or repair? or biomaterial? or subsitute?)) and (infect$ OR septic OR sepsis or biofilm?)).ab,kf,kw,ti.

3. 1 AND 2 

4. limit 3 to english language 340


==Embase (Elsevier, 1974-)==
2023-09-22
215 Records

1. 'bacteriophage'/exp OR 'phage therapy'/exp OR 'bacteriophage typing'/exp OR (phage? OR phagotherap* OR bacteriophag* OR endolysin?):ab,ti,kw

2. 'bone and joint infections'/de OR 'prosthesis infection'/exp OR 'infectious arthritis'/exp OR 'bacterial arthritis'/exp OR ((musculoskeletal OR bone? OR joint? OR periprosthetic OR prosthetic? OR prosthesis OR prostheses OR implant? OR osteoarticular OR orthopaedic OR orthopedic OR intraarticular OR biofilm? OR knee? OR hip?) NEAR/3 (infect* OR septic OR sepsis)) OR 'infectious arthritis' OR 'bacterial arthritis' OR 'septic arthritis' OR ((bone NEAR/3 (surgery OR surgeries OR repair? OR biomaterial? OR subsitute?) and (infect* OR septic OR sepsis or biofilm?))):ti,ab,kw

3. #1 AND #2 

4. #3 NOT 'conference abstract'/it 

5. #4 NOT 'conference paper'/it 

5. #4 AND [english]/lim 215


==Web of Science Core Collection (Clarivate)==
2023-09-22
603 Records

1. TI=((phage$ OR bacteriophage$))

2. AB=((phage$ OR bacteriophage$))

3. AK=((phage$ OR bacteriophage$))

4. 1 OR 2 OR 3

5. TI=((((musculoskeletal OR bone$ OR joint$ OR periprosthetic OR prosthetic$ OR prosthesis OR prostheses OR implant OR osteoarticular OR orthopaedic OR orthopedic OR intraarticular OR biofilm$ OR knee$ OR hip$) NEAR/3 infect* OR septic OR sepsis)) OR "infectious arthritis" OR "bacterial arthritis" OR "septic arthritis" OR (bone NEAR/3 (surgery OR surgeries OR repair? OR biomaterial? OR subsitute?) AND (infect* OR septic OR sepsis or biofilm?)))

6. AB=((((musculoskeletal OR bone$ OR joint$ OR periprosthetic OR prosthetic$ OR prosthesis OR prostheses OR implant OR osteoarticular OR orthopaedic OR orthopedic OR intraarticular OR biofilm$ OR knee$ OR hip$) NEAR/3 infect* OR septic OR sepsis)) OR "infectious arthritis" OR "bacterial arthritis" OR "septic arthritis" OR (bone NEAR/3 (surgery OR surgeries OR repair? OR biomaterial? OR subsitute?) AND (infect* OR septic OR sepsis or biofilm?)))

7. AK=((((musculoskeletal OR bone$ OR joint$ OR periprosthetic OR prosthetic$ OR prosthesis OR prostheses OR implant OR osteoarticular OR orthopaedic OR orthopedic OR intraarticular OR biofilm$ OR knee$ OR hip$) NEAR/3 infect* OR septic OR sepsis)) OR "infectious arthritis" OR "bacterial arthritis" OR "septic arthritis" OR (bone NEAR/3 (surgery OR surgeries OR repair? OR biomaterial? OR subsitute?) AND (infect* OR septic OR sepsis or biofilm?)))

8. 5 OR 6 OR 7 

9. 4 AND 8 606

Exclude Meeting Abstract and Retracted Publication

Limit English 593


==Cochrane Central==
2023-09-22
6 Records

#1	MeSH descriptor: [Phage Therapy] explode all trees	

#2	MeSH descriptor: [Bacteriophages] explode all trees	

#3	MeSH descriptor: [Bacteriophage Typing] explode all trees

#4	(phage$ OR bacteriophage$):ti,ab,kw

#5	#1 OR #2 OR #3 OR #4

#6	MeSH descriptor: [Prosthesis-Related Infections] explode all trees

#7	(((musculoskeletal OR bone$ OR joint$ OR periprosthetic OR prosthetic$ OR prosthesis OR prostheses OR implant$ OR osteoarticular OR orthopaedic OR orthopedic OR intraarticular OR biofilm$ OR knee$ OR hip$) NEAR/3 (infect* OR septic OR sepsis))):ti,ab,kw (Word variations have been searched)

#8	("infectious arthritis" OR "bacterial arthritis" OR "septic arthritis"):ti,ab,kw (Word variations have been searched)

#9	(((bone NEAR/3 (surgery or surgeries or repair? or biomaterial? or subsitute?)) and (infect$ OR septic OR sepsis or biofilm?))):ti,ab,kw (Word variations have been searched)

#10	#6 OR #7 OR #8 OR #9

#11	#5 AND #10

English limit 6
